# Supplementary material for: PepFun: Open Source Protocols for Peptide-Related Computational Analysis
Source: PubMed Central journal article supplement (PMC8002403; doi:10.3390/molecules26061664), 2021-03-16
Supplement: molecules-26-01664-s001.pdf [file molecules-26-01664-s001.pdf]

## Supplementary Information

### PepFun: open source protocols for peptide-related computational analysis

Rodrigo Ochoa<sup>1</sup> and Pilar Cossio<sup>1,2</sup>

<sup>1</sup>Biophysics of Tropical Diseases, Max Planck Tandem Group, University of Antioquia, 050010 Medellín, Colombia.

<sup>2</sup>Department of Theoretical Biophysics, Max Planck Institute of Biophysics, 60438 Frankfurt am Main, Germany.

### Supplementary Figures

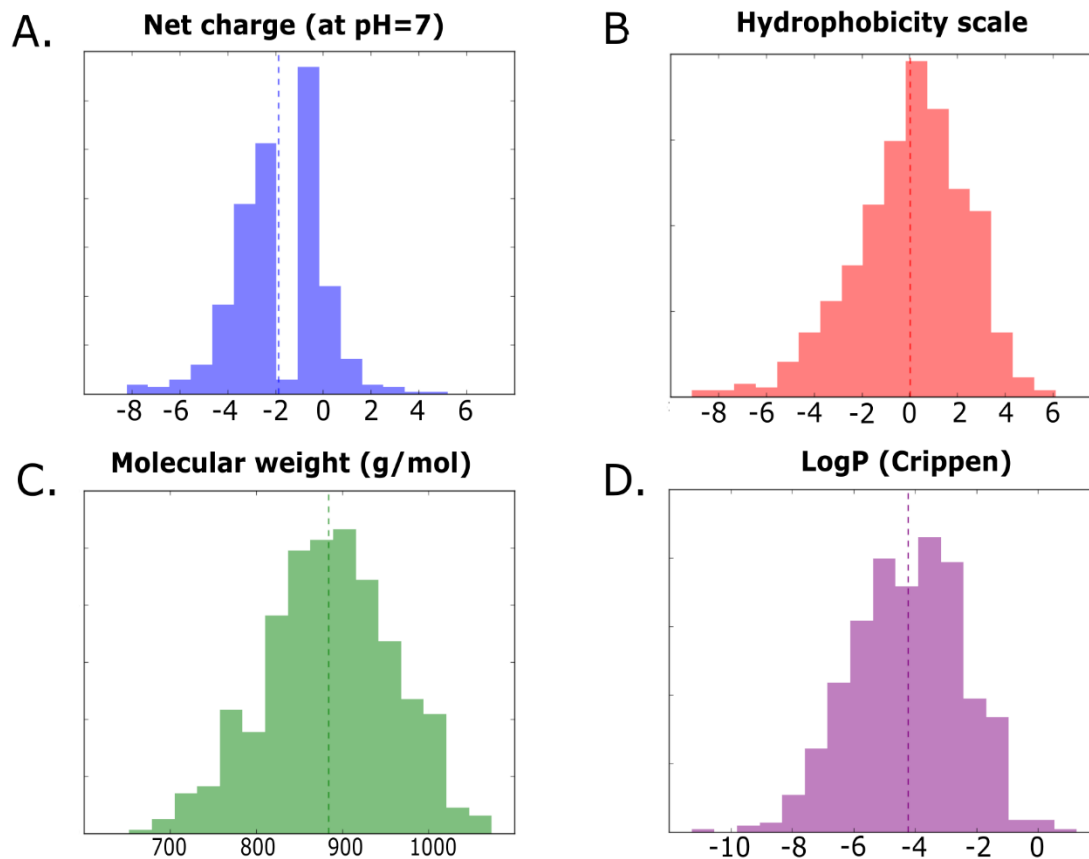

**Figure S1.** Distributions of peptide properties calculated with the sequence-based functions of PepFun. For the 599 peptides reported as substrates of the Granzyme B protease, four properties were calculated: the net charge (A), hydrophobicity with the Eisenberg scale [1] (B), the molecular weight (C) and the Crippen LogP [2] (D).

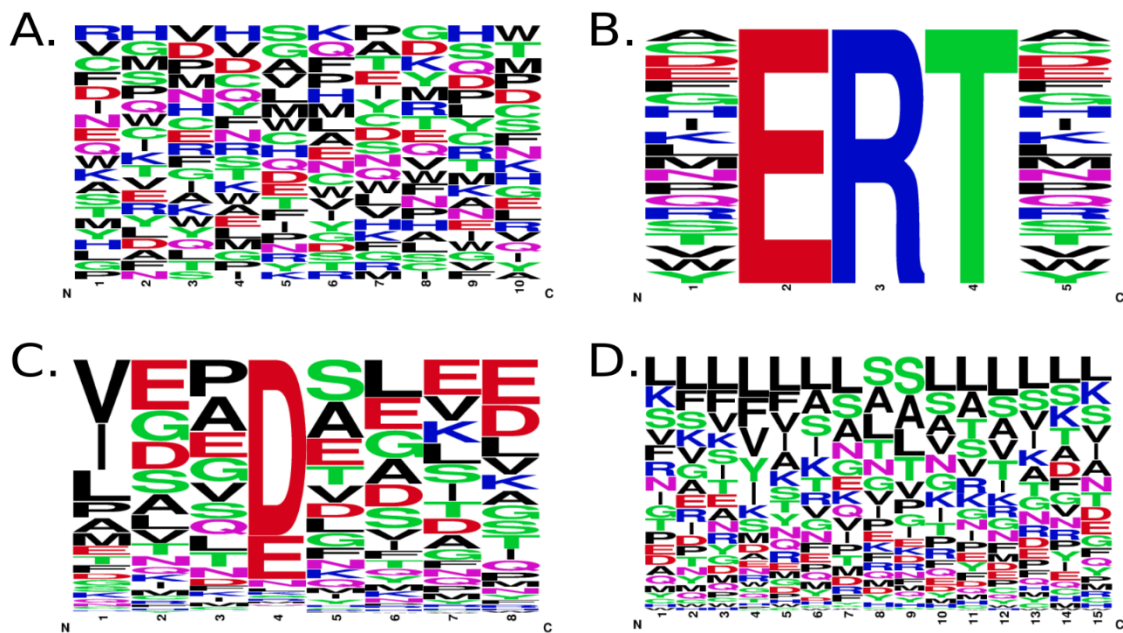

**Figure S2.** Logo of the libraries generated and used to test the PepFun functionalities. (A) Library of equally distributed amino acids in peptides of 10 amino acids long. (B) Library of 5-mer peptides using the pattern XERTX. (C) Library of known peptide substrates of the serine protease granzyme B. (D) Library of 15-mer peptides with bioactivity data against the MHC class II allele DRB1:0101. The last two come from experimental datasets.

## References

- [1] Eisenberg, D., Weiss, R. M., & Terwilliger, T. C. (1984). The hydrophobic moment detects periodicity in protein hydrophobicity. *Proceedings of the National Academy of Sciences*, *81*(1), 140-144.
- [2] Mannhold, R., & Van de Waterbeemd, H. (2001). Substructure and whole molecule approaches for calculating log P. *Journal of Computer-Aided Molecular Design*, *15*(4), 337-354.
